# Supplementary material
Source: PubMed Central journal article supplement (PMC2889103)
Supplement: 1002762107_pnas.201002762SI.pdf [file 1002762107_pnas.201002762SI.pdf]

# Supporting Information

Hoefl et al. 10.1073/pnas.1002762107

Table S1. Gray and white matter regional volumes of TD, DD, and FXS groups

| Brain regions                                                                                           | Mean average |       |       |       |       |       | Standard error of the mean |       |       |       |       |       |
|---------------------------------------------------------------------------------------------------------|--------------|-------|-------|-------|-------|-------|----------------------------|-------|-------|-------|-------|-------|
|                                                                                                         | Time1        |       |       | Time2 |       |       | Time1                      |       |       | Time2 |       |       |
|                                                                                                         | TD           | DD    | FXS   | TD    | DD    | FXS   | TD                         | DD    | FXS   | TD    | DD    | FXS   |
| <b>Gray matter</b>                                                                                      |              |       |       |       |       |       |                            |       |       |       |       |       |
| <b>Main effect of diagnosis: FXS &gt; TD/DD</b>                                                         |              |       |       |       |       |       |                            |       |       |       |       |       |
| Bil Caudate Body; Caudate Head; Putamen                                                                 | 1.878        | 1.869 | 2.090 | 2.010 | 1.917 | 2.252 | 0.039                      | 0.041 | 0.066 | 0.073 | 0.018 | 0.027 |
| Rt Middle, Inferior, Superior Frontal Gyri                                                              | 0.301        | 0.309 | 0.323 | 0.346 | 0.334 | 0.376 | 0.007                      | 0.007 | 0.009 | 0.011 | 0.003 | 0.005 |
| Rt Fusiform, Parahippocampal Gyri; Culmen of Cerebellum                                                 | 1.032        | 1.010 | 1.109 | 1.122 | 1.061 | 1.228 | 0.018                      | 0.018 | 0.033 | 0.039 | 0.008 | 0.013 |
| Bil Superior, Medial Frontal, Pre, Postcentral Gyri; Paracentral Lobule                                 | 5.067        | 5.232 | 5.409 | 5.430 | 5.116 | 6.111 | 0.043                      | 0.087 | 0.109 | 0.179 | 0.038 | 0.116 |
| Lt Middle, Superior Frontal Gyri                                                                        | 0.138        | 0.133 | 0.148 | 0.161 | 0.146 | 0.172 | 0.003                      | 0.003 | 0.006 | 0.004 | 0.002 | 0.003 |
| Lt Culmen, Tuber of Cerebellum                                                                          | 0.740        | 0.724 | 0.789 | 0.796 | 0.754 | 0.859 | 0.022                      | 0.039 | 0.012 | 0.011 | 0.009 | 0.009 |
| Lt Superior, Middle Frontal Gyri                                                                        | 0.177        | 0.177 | 0.195 | 0.212 | 0.197 | 0.231 | 0.005                      | 0.005 | 0.010 | 0.006 | 0.003 | 0.004 |
| Lt Superior, Middle, Inferior Occipital, Middle Temporal, Fusiform, Lingual Gyri; Declive of Cerebellum | 0.167        | 0.166 | 0.186 | 0.181 | 0.170 | 0.192 | 0.004                      | 0.005 | 0.002 | 0.006 | 0.003 | 0.004 |
| <b>Main effect of diagnosis: TD/DD &gt; FXS</b>                                                         |              |       |       |       |       |       |                            |       |       |       |       |       |
| Rt Insula; Precentral Gyrus                                                                             | 1.545        | 1.569 | 1.410 | 1.725 | 1.683 | 1.564 | 0.026                      | 0.027 | 0.046 | 0.027 | 0.012 | 0.016 |
| Lt Insula; Inferior Frontal Gyrus                                                                       | 1.423        | 1.445 | 1.315 | 1.599 | 1.569 | 1.449 | 0.020                      | 0.022 | 0.035 | 0.027 | 0.010 | 0.013 |
| Posterior Cingulate; Precuneus                                                                          | 0.515        | 0.580 | 0.476 | 0.541 | 0.589 | 0.491 | 0.015                      | 0.014 | 0.023 | 0.034 | 0.008 | 0.008 |
| Uvula of Vermis                                                                                         | 0.249        | 0.247 | 0.231 | 0.286 | 0.275 | 0.254 | 0.009                      | 0.019 | 0.007 | 0.007 | 0.004 | 0.004 |
| Posterior Cingulate                                                                                     | 0.173        | 0.188 | 0.157 | 0.188 | 0.193 | 0.166 | 0.004                      | 0.007 | 0.008 | 0.013 | 0.003 | 0.003 |
| <b>Interaction: FXS (Time2 &gt; Time1) &gt; TD/DD (Time2 &gt; Time1)</b>                                |              |       |       |       |       |       |                            |       |       |       |       |       |
| Rt Inferior, Middle Temporal, Middle Frontal Gyri                                                       | 8.265        | 8.374 | 8.411 | 8.560 | 8.084 | 9.352 | 0.071                      | 0.115 | 0.148 | 0.274 | 0.048 | 0.146 |
| Lt Inferior Frontal, Rectal, Orbital, Middle Frontal Gyri                                               | 0.570        | 0.601 | 0.563 | 0.617 | 0.613 | 0.652 | 0.009                      | 0.010 | 0.018 | 0.016 | 0.005 | 0.012 |
| Lt Lingual, Inferior Occipital Gyri                                                                     | 0.416        | 0.430 | 0.419 | 0.414 | 0.428 | 0.453 | 0.013                      | 0.015 | 0.020 | 0.018 | 0.008 | 0.010 |
| Posterior Cingulate, Cingulate Gyrus, Precuneus                                                         | 0.373        | 0.388 | 0.388 | 0.408 | 0.408 | 0.436 | 0.008                      | 0.009 | 0.015 | 0.016 | 0.005 | 0.007 |
| Lt Inferior Temporal, Fusiform, Middle, Inferior Occipital, Lingual Gyri; Cerebellum                    | 1.083        | 1.080 | 1.101 | 1.155 | 1.102 | 1.228 | 0.018                      | 0.019 | 0.016 | 0.029 | 0.008 | 0.009 |
| Bil Ventral Anterior, Medial Dorsal Nucleus of Thalamus                                                 | 0.957        | 0.958 | 0.964 | 1.019 | 0.953 | 1.074 | 0.018                      | 0.020 | 0.022 | 0.024 | 0.012 | 0.012 |
| <b>White matter</b>                                                                                     |              |       |       |       |       |       |                            |       |       |       |       |       |
| <b>Main effect of diagnosis: FXS &gt; TD/DD</b>                                                         |              |       |       |       |       |       |                            |       |       |       |       |       |
| Rt Ventral, Dorsal Prefrontal Regions, Medial Temporal Regions                                          | 3.122        | 3.112 | 3.320 | 3.641 | 3.600 | 3.951 | 0.024                      | 0.033 | 0.050 | 0.133 | 0.018 | 0.055 |
| Lt Ventral, Dorsal Prefrontal Regions, Medial Temporal Regions                                          | 1.980        | 1.986 | 2.099 | 2.296 | 2.280 | 2.479 | 0.019                      | 0.023 | 0.029 | 0.078 | 0.011 | 0.032 |
| <b>Main effect of diagnosis: TD/DD &gt; FXS</b>                                                         |              |       |       |       |       |       |                            |       |       |       |       |       |
| Rt Lateral Central Region                                                                               | 0.238        | 0.237 | 0.213 | 0.281 | 0.284 | 0.255 | 0.004                      | 0.005 | 0.005 | 0.019 | 0.003 | 0.005 |
| Lt Lateral Central Region                                                                               | 0.150        | 0.158 | 0.137 | 0.177 | 0.182 | 0.164 | 0.003                      | 0.004 | 0.005 | 0.010 | 0.002 | 0.004 |
| <b>Interaction: FXS (Time2 &gt; Time1) &gt; TD/DD (Time2 &gt; Time1)</b>                                |              |       |       |       |       |       |                            |       |       |       |       |       |
| Bil Ventral, Dorsal Prefrontal Regions, Medial Temporal Regions                                         | 8.210        | 8.234 | 8.347 | 9.489 | 9.353 | 9.998 | 0.084                      | 0.078 | 0.117 | 0.332 | 0.047 | 0.136 |
| Lt Medial Temporal Region                                                                               | 0.185        | 0.189 | 0.190 | 0.237 | 0.232 | 0.257 | 0.006                      | 0.006 | 0.004 | 0.009 | 0.004 | 0.006 |

Order corresponds to those listed in Table S2. Units are in milliliters.

**Table S2. Gray and white matter regional volume differences between groups and over time**

| Brain regions                                                                                           | Brodmann area          | Talairach coordinates |     |     | T value | Threshold (FDR) | Cluster size, voxels<br>1 × 1 × 1 mm |
|---------------------------------------------------------------------------------------------------------|------------------------|-----------------------|-----|-----|---------|-----------------|--------------------------------------|
|                                                                                                         |                        | X                     | Y   | Z   |         |                 |                                      |
| <b>Gray matter</b>                                                                                      |                        |                       |     |     |         |                 |                                      |
| <b>Main effect of diagnosis: FXS &gt; TD/DD</b>                                                         |                        |                       |     |     |         |                 |                                      |
| Bil Caudate Body; Caudate Head; Putamen                                                                 |                        | -16                   | 8   | 11  | 9.09    | <0.001          | 3114                                 |
|                                                                                                         |                        | 16                    | 14  | 5   | 8.52    | <0.001          |                                      |
|                                                                                                         |                        | 18                    | 8   | 12  | 8.31    | <0.001          |                                      |
| Rt Middle, Inferior, Superior Frontal Gyri                                                              | 11, 47                 | 22                    | 44  | -11 | 5.99    | <0.001          | 488                                  |
|                                                                                                         |                        | 18                    | 24  | -16 | 3.74    | 0.01            |                                      |
| Rt Fusiform, Parahippocampal Gyri; Culmen of Cerebellum                                                 | 20, 36                 | 44                    | -32 | -24 | 5.82    | <0.001          | 1458                                 |
|                                                                                                         |                        | 53                    | -42 | -23 | 4.85    | <0.001          |                                      |
|                                                                                                         |                        | 40                    | -37 | -32 | 4.3     | <0.001          |                                      |
| Bil Superior, Medial Frontal, Pre, Postcentral Gyri; Paracentral Lobule                                 | 8, 5, 6                | 14                    | 39  | 44  | 5.7     | <0.001          | 8125                                 |
|                                                                                                         |                        | -2                    | -42 | 61  | 5.4     | <0.001          |                                      |
|                                                                                                         |                        | -2                    | 33  | 46  | 5.38    | <0.001          |                                      |
| Lt Middle, Superior Frontal Gyri                                                                        | 11                     | -22                   | 48  | -11 | 5.58    | <0.001          | 222                                  |
| Lt Culmen, Tuber of Cerebellum                                                                          |                        | -34                   | -40 | -28 | 4.44    | <0.001          | 1006                                 |
|                                                                                                         |                        | -51                   | -44 | -23 | 3.99    | <0.001          |                                      |
| Lt Superior, Middle Frontal Gyri                                                                        | 10                     | -28                   | 46  | 20  | 4.35    | <0.001          | 255                                  |
| Lt Superior, Middle, Inferior Occipital, Middle Temporal, Fusiform, Lingual Gyri; Declive of Cerebellum | 19, 39, 18             | -38                   | -82 | 28  | 3.5     | 0.01            | 251                                  |
|                                                                                                         |                        | -36                   | -71 | 24  | 3.41    | 0.01            |                                      |
| <b>Main effect of diagnosis: TD/DD &gt; FXS</b>                                                         |                        |                       |     |     |         |                 |                                      |
| Rt Insula; Precentral Gyrus                                                                             | 13, 6                  | 42                    | -5  | 15  | 7.11    | <0.001          | 2035                                 |
|                                                                                                         |                        | 53                    | -10 | 28  | 5.46    | <0.001          |                                      |
|                                                                                                         |                        | 34                    | 10  | 9   | 5.39    | <0.001          |                                      |
| Lt Insula; Inferior Frontal Gyrus                                                                       | 13, 45                 | -30                   | 24  | 10  | 6.06    | <0.001          | 1881                                 |
|                                                                                                         |                        | -34                   | 1   | 13  | 5.71    | <0.001          |                                      |
|                                                                                                         |                        | -38                   | -11 | 13  | 5.34    | <0.001          |                                      |
| Posterior Cingulate; Precuneus Uvula of Vermis                                                          | 31, 30                 | 22                    | -60 | 14  | 5.08    | <0.001          | 636                                  |
|                                                                                                         |                        | 0                     | -66 | -32 | 4.68    | <0.001          | 320                                  |
|                                                                                                         |                        | 2                     | -48 | -25 | 3.46    | 0.02            |                                      |
| Posterior Cingulate                                                                                     | 30                     | -14                   | -63 | 14  | 4.18    | <0.001          | 216                                  |
|                                                                                                         |                        | -22                   | -55 | 21  | 3.39    | 0.02            |                                      |
| <b>Interaction: FXS (Time2 &gt; Time1) &gt; TD/DD (Time2 &gt; Time1)</b>                                |                        |                       |     |     |         |                 |                                      |
| Rt Inferior, Middle Temporal, Middle Frontal Gyri                                                       | 20, 9, 21, 8           | 59                    | -30 | -20 | 6.32    | <0.001          | 12950                                |
|                                                                                                         |                        | 53                    | 15  | 34  | 5.73    | <0.001          |                                      |
|                                                                                                         |                        | 67                    | -16 | -1  | 5.59    | <0.001          |                                      |
| Lt Inferior Frontal, Rectal, Orbital, Middle Frontal Gyri                                               | 47, 11                 | -14                   | 9   | -22 | 5.11    | <0.001          | 899                                  |
|                                                                                                         |                        | -8                    | 22  | -25 | 4.99    | <0.001          |                                      |
|                                                                                                         |                        | 4                     | 28  | -27 | 4.9     | <0.001          |                                      |
| Lt Lingual, Inferior Occipital Gyri                                                                     | 17, 18                 | -12                   | -94 | -10 | 4.71    | 0.01            | 631                                  |
|                                                                                                         |                        | -2                    | -82 | -6  | 4.1     | 0.01            |                                      |
| Posterior Cingulate, Cingulate Gyrus, Precuneus                                                         | 23, 31                 | -2                    | -32 | 22  | 4.56    | 0.01            | 549                                  |
|                                                                                                         |                        | 14                    | -33 | 38  | 2.84    | 0.03            |                                      |
|                                                                                                         |                        | -8                    | -51 | 32  | 2.72    | 0.04            |                                      |
| Lt Inferior Temporal, Fusiform, Middle, Inferior Occipital, Lingual Gyri; Cerebellum                    | 20, 37, 19, 28, 17, 18 | -57                   | -28 | -22 | 4.53    | 0.01            | 1633                                 |
|                                                                                                         |                        | -51                   | -63 | -12 | 4.43    | 0.01            |                                      |
|                                                                                                         |                        | -50                   | -55 | -17 | 4.31    | 0.01            |                                      |
| Bil Ventral Anterior, Medial Dorsal Nucleus of Thalamus                                                 |                        | -6                    | -7  | 13  | 4.45    | 0.01            | 1481                                 |
|                                                                                                         |                        | -2                    | -14 | -1  | 4.17    | 0.01            |                                      |
|                                                                                                         |                        | 12                    | -9  | 17  | 3.83    | 0.01            |                                      |
| <b>White matter</b>                                                                                     |                        |                       |     |     |         |                 |                                      |
| <b>Main effect of diagnosis: FXS &gt; TD/DD</b>                                                         |                        |                       |     |     |         |                 |                                      |
| Rt Ventral, Dorsal Prefrontal Regions, Medial Temporal Regions                                          |                        | 22                    | 13  | 21  | 6.29    | <0.001          | 4738                                 |
|                                                                                                         |                        | 22                    | 22  | 12  | 5.81    | <0.001          |                                      |
|                                                                                                         |                        | 34                    | -43 | -1  | 5.64    | <0.001          |                                      |
| Lt Ventral, Dorsal Prefrontal Regions, Medial Temporal Regions                                          |                        | -34                   | -43 | -3  | 5.92    | <0.001          | 3019                                 |
|                                                                                                         |                        | -34                   | -44 | 15  | 4.73    | <0.001          |                                      |
|                                                                                                         |                        | -20                   | 11  | 23  | 4.46    | <0.001          |                                      |
| <b>Main effect of diagnosis: TD/DD &gt; FXS</b>                                                         |                        |                       |     |     |         |                 |                                      |
| Rt Lateral Central Region                                                                               |                        | 50                    | -10 | 34  | 5.4     | <0.001          | 391                                  |
|                                                                                                         |                        | 53                    | -7  | 24  | 5.16    | <0.001          |                                      |

Table S2. Cont.

| Brain regions                                                            | Brodmann area | Talairach coordinates |     |     | T value | Threshold (FDR) | Cluster size, voxels<br>1 × 1 × 1 mm |
|--------------------------------------------------------------------------|---------------|-----------------------|-----|-----|---------|-----------------|--------------------------------------|
|                                                                          |               | X                     | Y   | Z   |         |                 |                                      |
| Lt Lateral Central Region                                                |               | 42                    | -7  | 22  | 5.04    | <0.001          | 251                                  |
|                                                                          |               | -50                   | -12 | 32  | 4.78    | <0.001          |                                      |
|                                                                          |               | -50                   | -7  | 17  | 4.42    | 0.01            |                                      |
|                                                                          |               | -59                   | -9  | 19  | 4.37    | 0.01            |                                      |
| <b>Interaction: FXS (Time2 &gt; Time1) &gt; TD/DD (Time2 &gt; Time1)</b> |               |                       |     |     |         |                 |                                      |
| Bil Ventral, Dorsal Prefrontal Regions, Medial Temporal Regions          |               | -36                   | -49 | -1  | 4.63    | 0.02            | 11101                                |
|                                                                          |               | 26                    | 11  | 22  | 4.36    | 0.02            |                                      |
|                                                                          |               | -20                   | 13  | 27  | 4.2     | 0.02            |                                      |
|                                                                          |               | -42                   | -9  | -20 | 3.75    | 0.02            |                                      |
| Lt Medial Temporal Region                                                |               | -42                   | -9  | -20 | 3.75    | 0.02            | 347                                  |

Brain regions and Brodmann areas of only peak voxels are listed.
